# Supplementary material
Source: PubMed Central journal article supplement (PMC3423079)
Supplement: NIHMS390721-supplement-01.pdf [file NIHMS390721-supplement-01.pdf]

# Supplementary Figure S1 - Bayly et al.

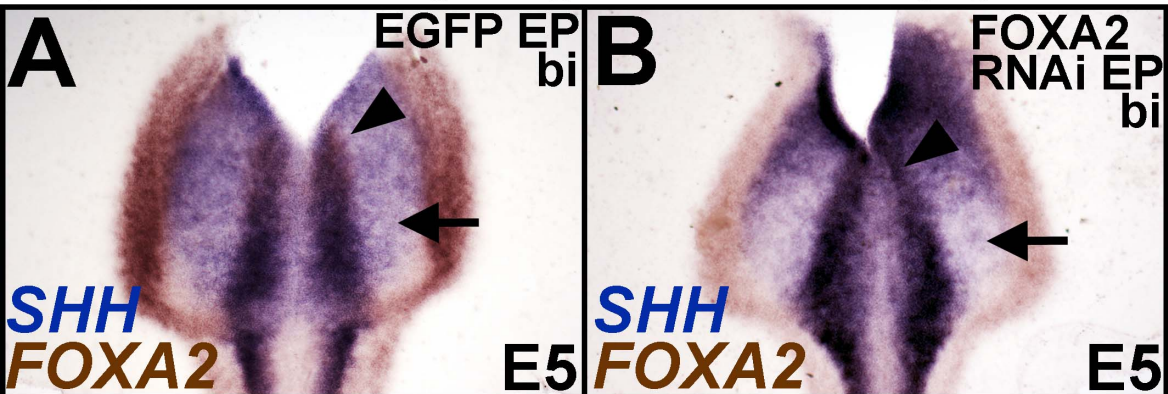

# Supplementary Figure S2 - Bayly et al.

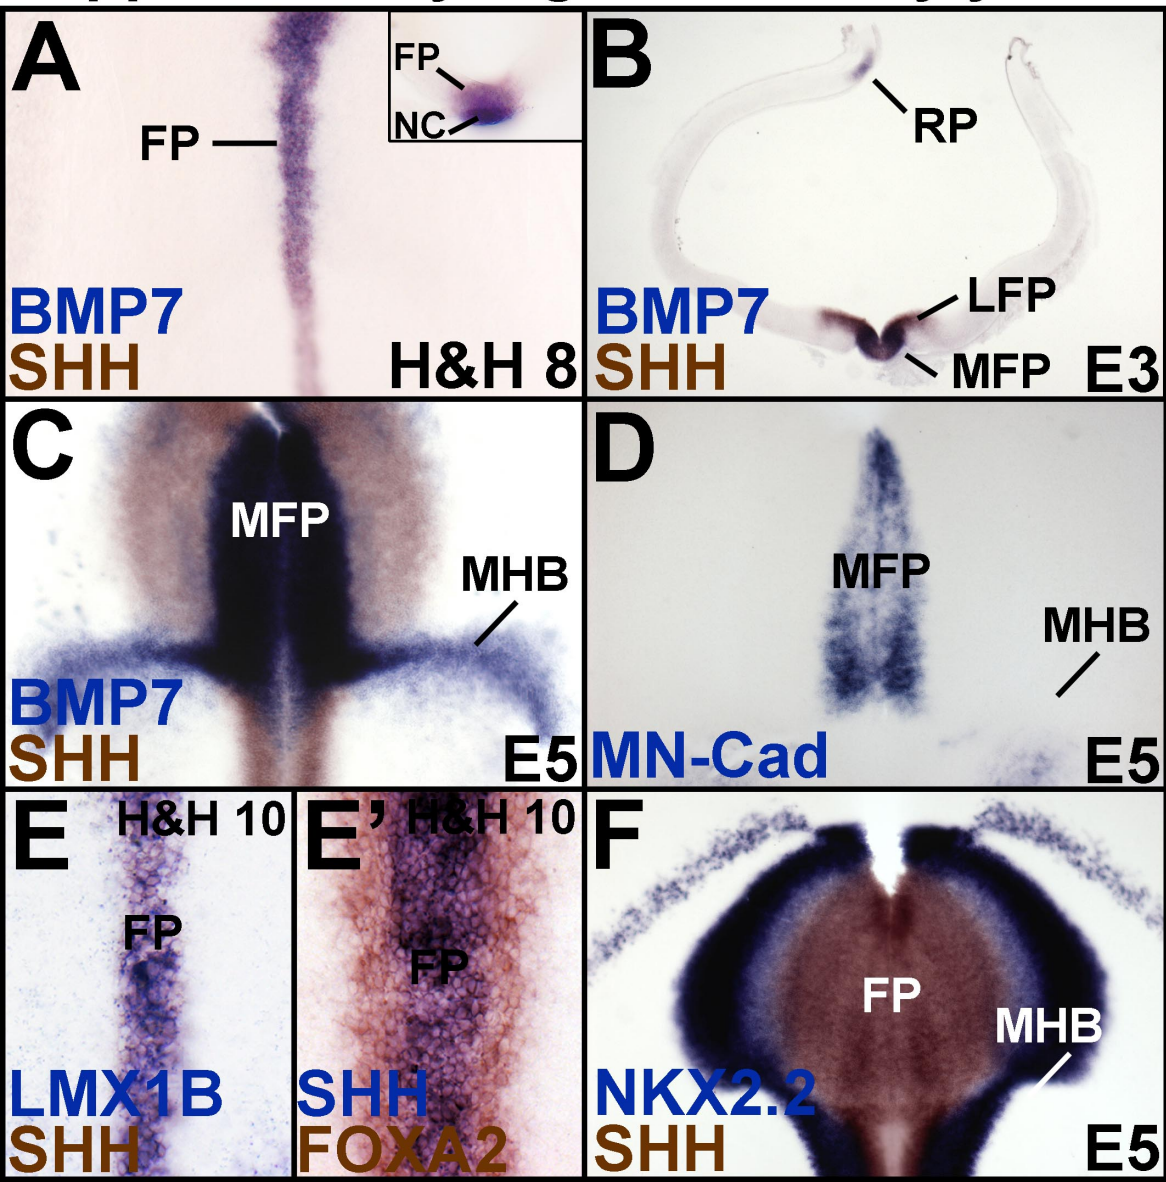

# Supplementary Figure S3 - Bayly et al.

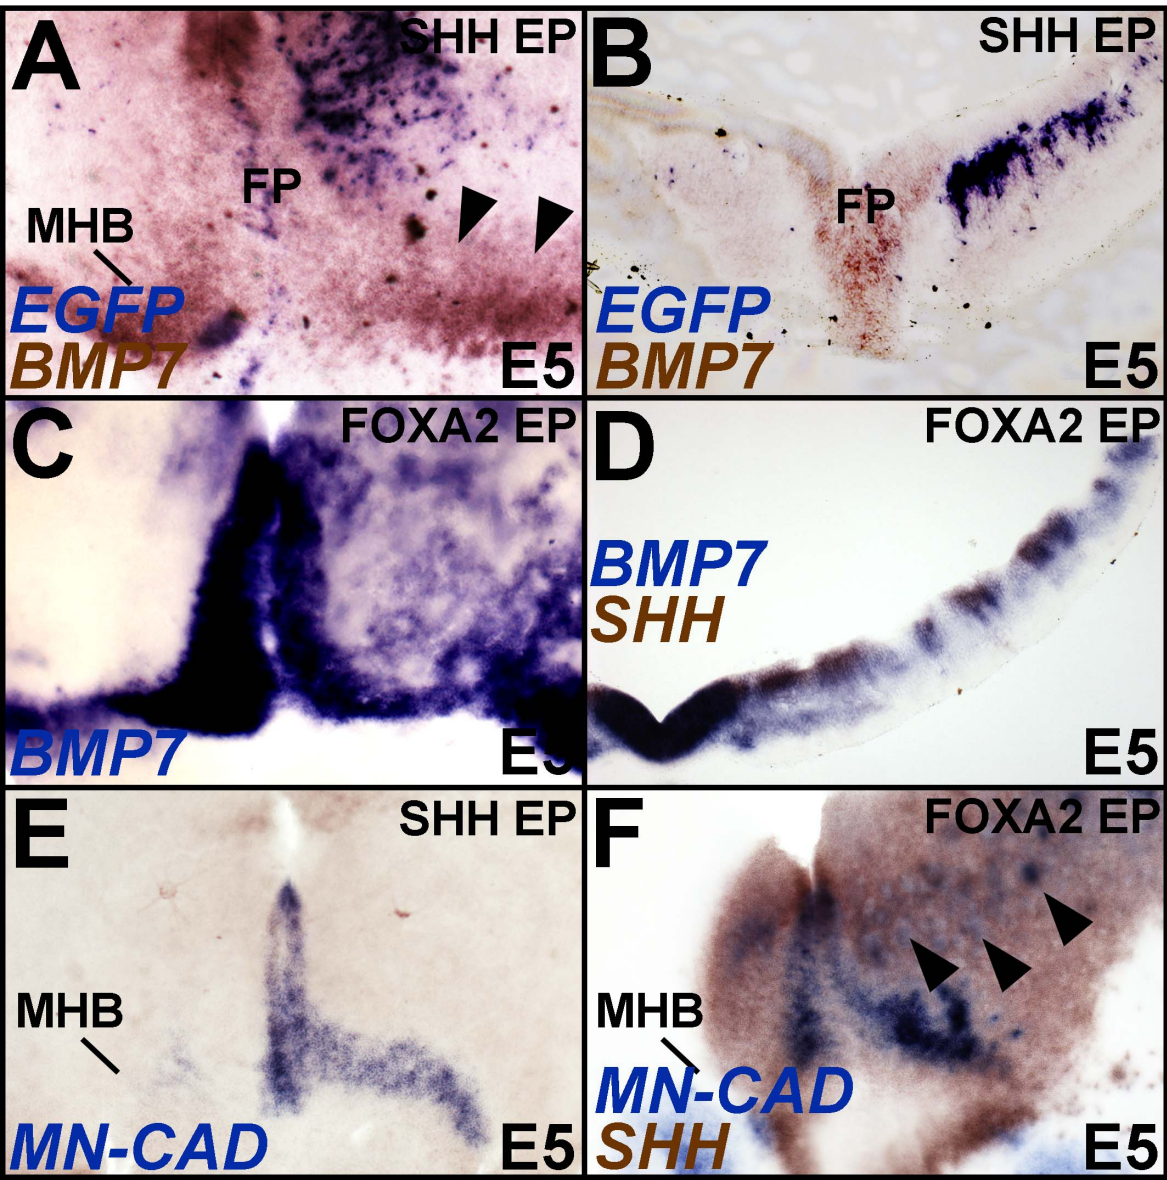

# Supplementary Figure S4 - Bayly et al.

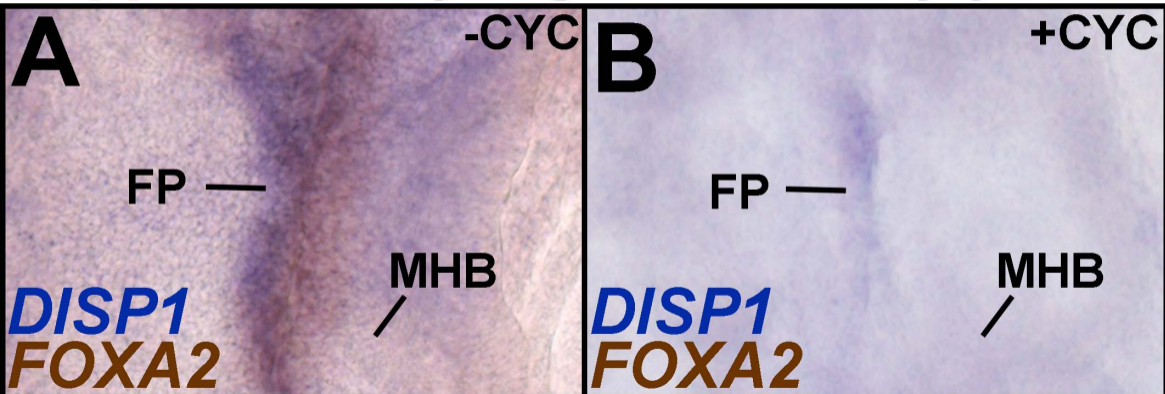

# Supplementary Figure S5 - Bayly et al.

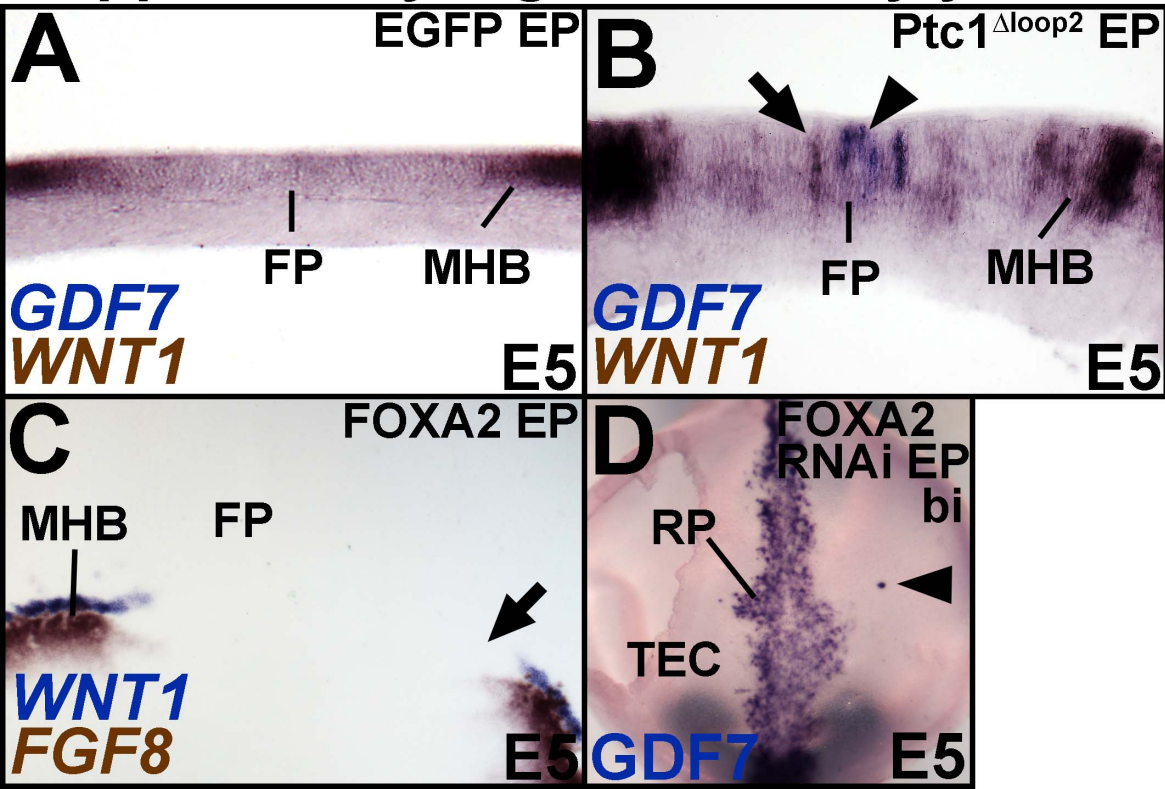

# Supplementary Figure S6 - Bayly et al.

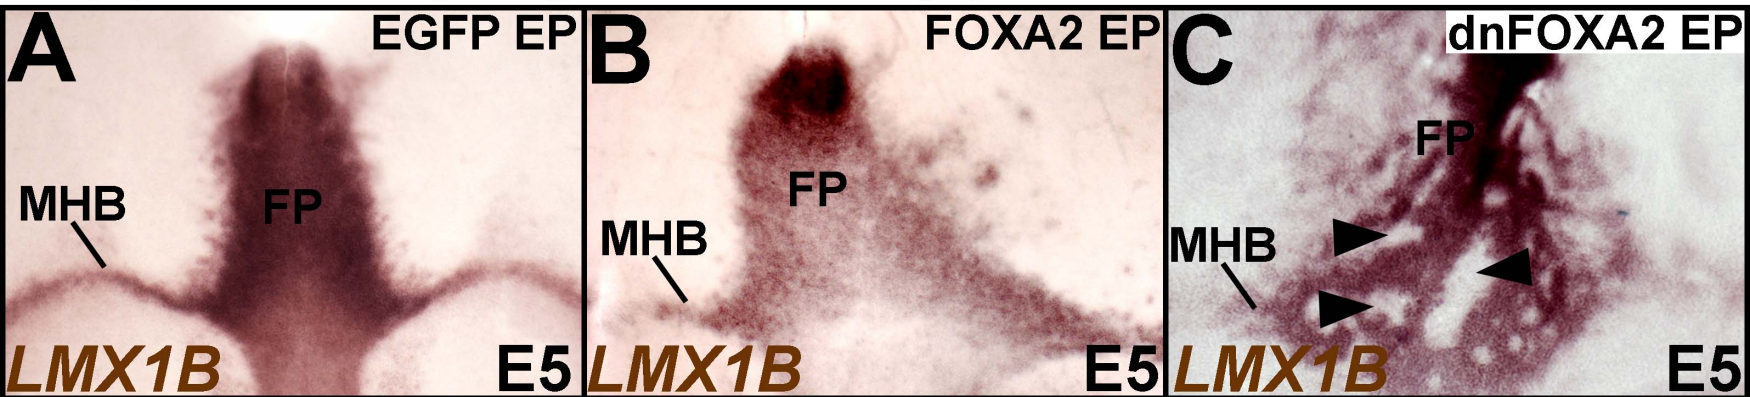

## Supplementary Figure Legends

**Supplementary Figure S1. FOXA2 RNAi suppresses FOXA2 expression.** Compared to electroporated controls (A), bilateral misexpression of FOXA2 RNAi results in lowered FOXA2 (brown) expression (arrowheads, A, B). The expression of SHH, a transcriptional target of FOXA2 is also reduced (arrows, A, B).

**Supplementary Figure S2. Gene expression patterns in the midbrain FP. (A)** Flattened wholemount and cross-section (inset, A) displaying BMP7 and SHH co-expression in midbrain FP. **(B, C)** E3 cross-section and E5 wholemount demonstrating that BMP7 expression distinguishes the MFP from the LFP. Note that BMP7 is also expressed in the RP (B) and the MHB (C). **(D)** E5 wholemount demonstrating that MN-CAD is exclusively expressed in the MFP. **(E, E')** Wholemounts demonstrating that LMX1B (E, blue), SHH (E, brown; E', blue) and FOXA2 (brown, E') are expressed in a mosaic pattern within FP. **(F)** NKX2.2 expression occurs lateral to the SHH+ FP.

**Supplementary Figure S3. FOXA2, but not SHH, is sufficient to induce the MFP. (A, B)** Wholemount (A) and cross-section (B) demonstrating that unilateral (right side) misexpression of SHH is insufficient to induce BMP7 anywhere in the midbrain except the MHB (arrowheads). **(C, D)** Wholemount (C) and cross-section (D) demonstrating that FOXA2 misexpression is sufficient to induce BMP7 expression anywhere in ventral midbrain. **(E, F)** E5 wholemounts demonstrating that unilateral SHH misexpression (E) can induce MN-CAD only along the MHB (right side), while FOXA2 misexpression (F) can induce MN-CAD anywhere in the ventral midbrain.

**Supplementary Figure S4. HH signaling is required for inducing HH-target/pathway genes in the MFP.** H&H 3-5 explants (flattened wholemount view) treated with either the vehicle (A) or cyclopamine (B) for 24 hours demonstrate that the HH-target genes, DISP1 and FOXA2 are severely reduced following cyclopamine treatment.

**Supplementary Figure S5. SHH and FOXA2 regulate midbrain signaling center identity.**

**(A, B)** Unlike EGFP-electroporated controls (A), *Ptc1* <sup>$\Delta$ loop2</sup>-electroporated brains (B) display ectopically induced *GDF7*+/*WNT1*+ RP cells (blue + brown, arrowhead) and *WNT1*+/*GDF7*-negative MHB cells (brown, arrow) along the ventral midline. **(C)** Unilateral *FOXA2* misexpression (right side) suppresses MHB expression of *WNT1* and *FGF8* (arrow). **(D)** Top down view of RP demonstrating that compared to EGFP-electroporated controls (see Fig. 7A), the RP is expanded as a consequence of *FOXA2* (arrowhead) downregulation in ventral midbrain

**Supplementary Figure S6. FOXA2 is necessary and sufficient for MFP induction. (A)** H&H

4-6 electroporations of EGFP showing normal *LMX1B* expression in the MFP. *FOXA2* misexpression (B) at H&H 4-6 results in increased *LMX1B* expression, while dn*FOXA2* misexpression (C) at the same age results in blockade of *LMX1B* in the MFP (arrowheads).
